# Supplementary material
Source: bioRxiv or medRxiv preprint supplement (https://www.biorxiv.org/highwire/filestream/137419/field_highwire_adjunct_files/0/431361-1.pdf)
Supplement: Supplementary file [file 431361-1.pdf]

# Blended Bioinformatics Training in Resource-Limited Settings

A case study of challenges and Opportunities for Implementation  
Supplementary materials

October 29, 2018

## Listings

|   |                                                |   |
|---|------------------------------------------------|---|
| 1 | rpart tree model . . . . .                     | 2 |
| 2 | 10 fold multinomial model validation . . . . . | 3 |

## List of Figures

|     |                                                                                                                                                                                                                                                                                                                                                                                                                                                                                                                            |   |
|-----|----------------------------------------------------------------------------------------------------------------------------------------------------------------------------------------------------------------------------------------------------------------------------------------------------------------------------------------------------------------------------------------------------------------------------------------------------------------------------------------------------------------------------|---|
| SF1 | Media effect: How participants knew about the IBT . . . . .                                                                                                                                                                                                                                                                                                                                                                                                                                                                | 5 |
| SF2 | Surveys filled by participants Consistency of filling the 3 evaluation surveys by the IBT participants in Sudan node: Main library & CBSB laboratory. The numbers represents how many participant filled the given survey from the total 73. For example, 33 filled all surveys, and 15 filled no survey at all, and so on. . . . .                                                                                                                                                                                        | 6 |
| SF3 | Class demographics and performance distribution: A) Generalized pairs plot of the logistics and demographics of the class (lab location, Gender, Educational level and Studentship) against IBT participants' performance (Success, Withdrawal or Failure). B) Participants' Participants' affiliations distribution with respect to their performance . . . . .                                                                                                                                                           | 7 |
| SF4 | rpart performance classification tree: Recursive PARTitioning (rpart) classification model of the main covariates affecting participants performance in the IBT (Success, Withdrawal, or Failure). Each node shows the predicted learner performance, the probability of each performance category based on the node group, and the percentage of observations in the node. Here, we see that Gender is most important covariate for predicting the performance of an IBT course participant as per the 2017 data. . . . . | 7 |
| SF5 | Conditional Inference Tree for Participants Performance in the IBT. Here, we see that the physical classroom location is the most important covariate in predicting an IBT participant's performance . . . . .                                                                                                                                                                                                                                                                                                             | 8 |
| SF6 | IBT participants perceptions: Databases module . . . . .                                                                                                                                                                                                                                                                                                                                                                                                                                                                   | 8 |
| SF7 | IBT participants perceptions: Linux module . . . . .                                                                                                                                                                                                                                                                                                                                                                                                                                                                       | 9 |

|      |                                                                                                                                                                                                                                        |    |
|------|----------------------------------------------------------------------------------------------------------------------------------------------------------------------------------------------------------------------------------------|----|
| SF8  | IBT participants perceptions: Pair wise alignment module. For the prior familiarity, we used the same responses in producing figure SF9 , because participants were expected to have low familiarity with both types . . . . .         | 9  |
| SF9  | IBT participants perceptions: multiple sequence alignment module. For the prior familiarity, we used the same responses in producing figure SF8 , because participants were expected to have low familiarity with both types . . . . . | 9  |
| SF10 | IBT participants perceptions: Genomics module . . . . .                                                                                                                                                                                | 10 |
| SF11 | IBT participants perceptions: phylogenetics module . . . . .                                                                                                                                                                           | 10 |
| SF12 | Progress of a participants from the IBT 2017 iteration from their career status at the beginning of the course, and 1 year after that date. . . . .                                                                                    | 10 |
| SF13 | Responses from the 30 participants from the 2017 IBT run collected 9 months upon the end of the course, asking about which ways the IBT helped them with their career. . . . .                                                         | 11 |
| SF14 | TAs perspective: Evaluation of the teaching experience (n =7) .                                                                                                                                                                        | 11 |
| SF15 | TAs perspectives: Personal reflections (n=7) . . . . .                                                                                                                                                                                 | 11 |
| SF16 | Language of instruction of the IBT participants in their BSc and MSc education . . . . .                                                                                                                                               | 12 |

## 1 Mathematical models details

Listing 1: rpart tree model

---

```

Call:
rpart(formula = pass ~ lab + Gender + educational_level + Studentship
+
Affiliations, data = data_grads_demographics, method = "class")
n= 73

CP nsplit rel error xerror xstd
1 0.04545455 0 1.0000000 1.000000 0.1782019
2 0.01000000 1 0.9545455 1.090909 0.1824398

Variable importance
Gender
100

Node number 1: 73 observations, complexity param=0.04545455
predicted class=Success expected loss=0.3013699 P(node) =1
class counts: 51 19 3
probabilities: 0.699 0.260 0.041
left son=2 (59 obs) right son=3 (14 obs)
Primary splits:
Gender splits as LR, improve=2.2747350, (0 missing)
lab splits as LR, improve=2.1665210, (0 missing)
Affiliations splits as RRLLLR, improve=1.3764880, (9 missing)
Studentship splits as LRL, improve=0.8760305, (0 missing)
educational_level splits as RLRL, improve=0.2866640, (0 missing)

```

```
Node number 2: 59 observations
predicted class=Success expected loss=0.2372881 P(node) =0.8082192
class counts: 45 12 2
probabilities: 0.763 0.203 0.034

Node number 3: 14 observations
predicted class=Withdraw expected loss=0.5 P(node) =0.1917808
class counts: 6 7 1
probabilities: 0.429 0.500 0.071
```

---

Listing 2: 10 fold multinomial model validation

---

Penalized Multinomial Regression

```
64 samples
5 predictors
3 classes: 'Success', 'Withdraw', 'Fail'
```

```
No pre-processing
Resampling: Cross-Validated (10 fold)
Summary of sample sizes: 57, 58, 58, 57, 57, 58, ...
Resampling results across tuning parameters:
```

```
decay Accuracy Kappa
0e+00 0.6591667 0.07751040
1e-04 0.6591667 0.07751040
1e-01 0.7401190 0.08571429
```

```
Accuracy was used to select the optimal model using the largest value.
The final value used for the model was decay = 0.1.
```

---

Table ST1: 10-fold cross validated multinomial model of the IBT 2017 participants' performance in the course as measured in the H3ABioNet node of Sudan

|                                   | <i>Dependent variable:</i>  |                   |
|-----------------------------------|-----------------------------|-------------------|
|                                   | Withdraw<br>(1)             | Fail<br>(2)       |
| labMain_Library                   | 1.103*<br>(0.642)           | 1.206<br>(1.361)  |
| GenderMale                        | 1.374*<br>(0.721)           | 0.883<br>(1.510)  |
| educational_levelMSC              | -1.362<br>(1.546)           | -0.394<br>(2.914) |
| educational_levelPHD              | -1.029<br>(1.676)           | -1.243<br>(3.576) |
| StudentshipStudents               | 0.094<br>(0.697)            | 0.999<br>(1.767)  |
| AffiliationsHospital              | 1.596<br>(2.772)            | -0.190<br>(5.975) |
| AffiliationsNot_Employed          | -1.580<br>(2.206)           | -1.344<br>(3.421) |
| AffiliationsPrivate_Sector        | -0.993<br>(2.825)           | -0.808<br>(3.127) |
| AffiliationsResearch_Centres      | -1.030<br>(1.938)           | -1.386<br>(2.857) |
| AffiliationsUniversities_Colleges | -0.043<br>(1.534)           | -1.149<br>(1.805) |
| Constant                          | -0.452<br>(2.304)           | -2.624<br>(3.893) |
| Akaike Inf. Crit.                 | 131.217                     | 131.217           |
| <i>Note:</i>                      | *p<0.1; **p<0.05; ***p<0.01 |                   |

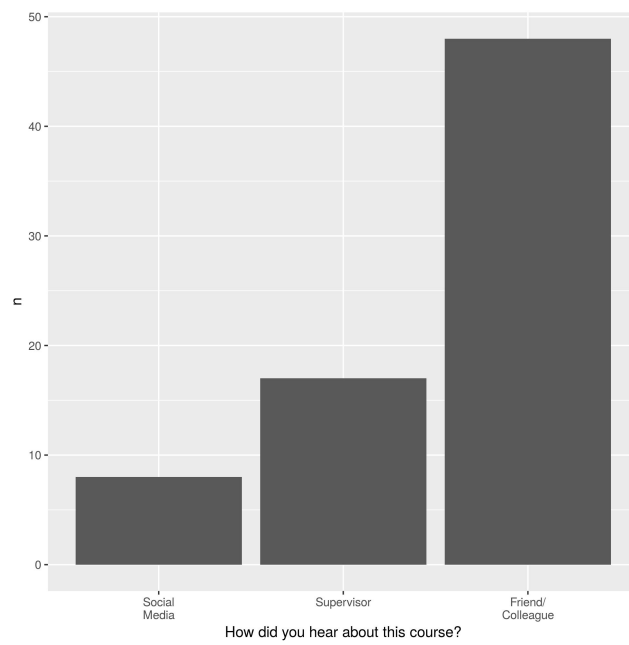

Figure SF1: **Media effect:** How participants knew about the IBT

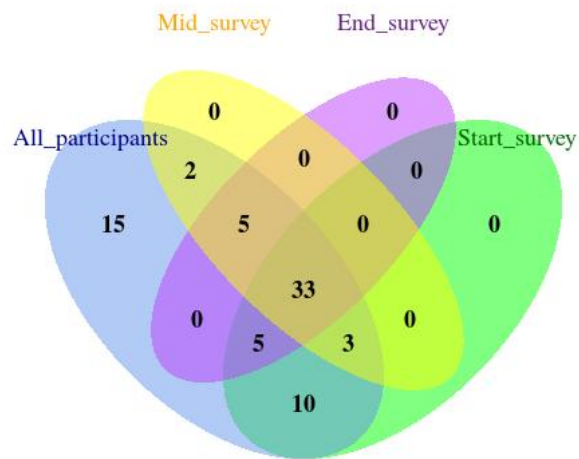

Figure SF2: **Surveys filled by participants** Consistency of filling the 3 evaluation surveys by the IBT participants in Sudan node: Main library & CBSB laboratory. The numbers represents how many participant filled the given survey from the total 73. For example, 33 filled all surveys, and 15 filled no survey at all, and so on.

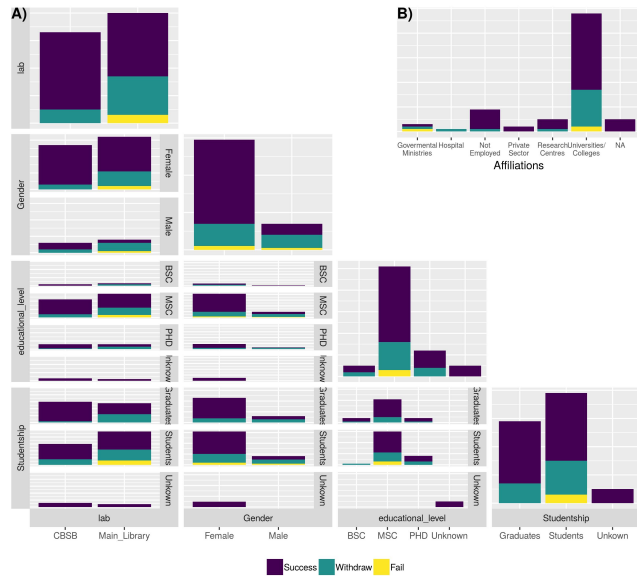

Figure SF3: **Class demographics and performance distribution:** A) Generalized pairs plot of the logistics and demographics of the class (lab location, Gender, Educational level and Studentship) against IBT participants' performance (Success, Withdrawal or Failure). B) Participants' Participants' affiliations distribution with respect to their performance

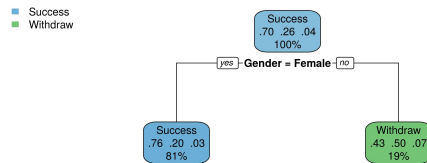

Figure SF4: **rpart performance classification tree:** Recursive PARTitioning (rpart) classification model of the main covariates affecting participants performance in the IBT (Success, Withdrawal, or Failure). Each node shows the predicted learner performance, the probability of each performance category based on the node group, and the percentage of observations in the node. Here, we see that Gender is most important covariate for predicting the performance of an IBT course participant as per the 2017 data.

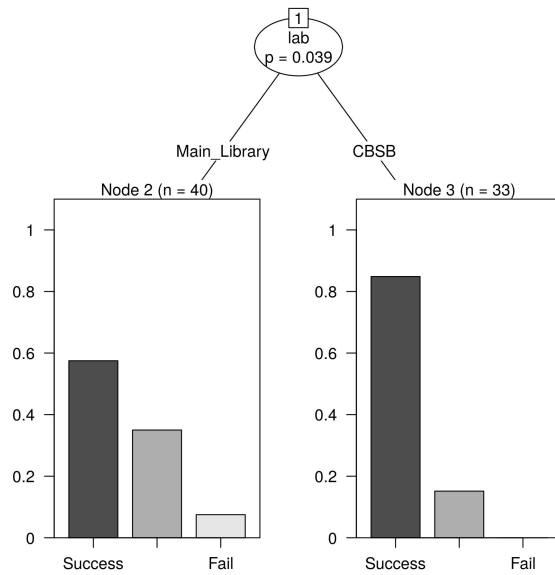

Figure SF5: **Conditional Inference Tree for Participants Performance in the IBT.** Here, we see that the physical classroom location is the most important covariate in predicting an IBT participant's performance

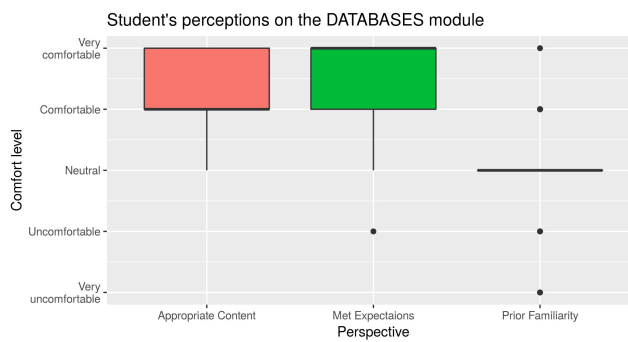

Figure SF6: IBT participants perceptions: Databases module



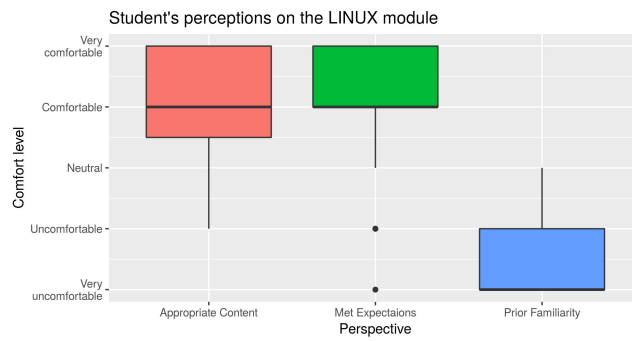

Figure SF7: IBT participants perceptions: Linux module

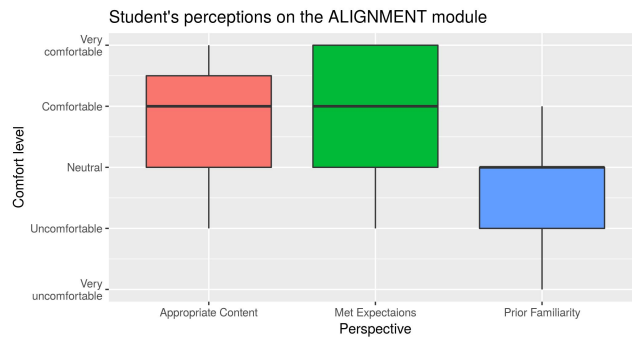

Figure SF8: IBT participants perceptions: Pair wise alignment module. For the prior familiarity, we used the same responses in producing figure SF9 , because participants were expected to have low familiarity with both types

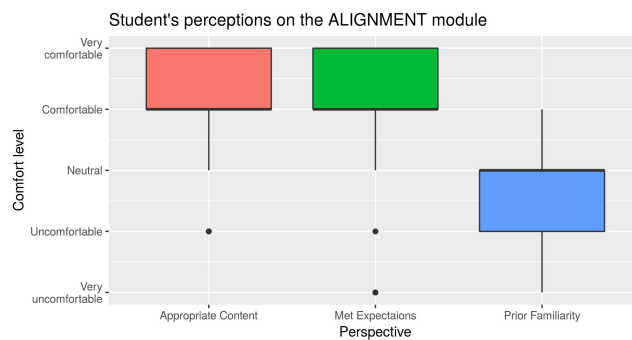

Figure SF9: IBT participants perceptions: multiple sequence alignment module. For the prior familiarity, we used the same responses in producing figure SF8 , because participants were expected to have low familiarity with both types

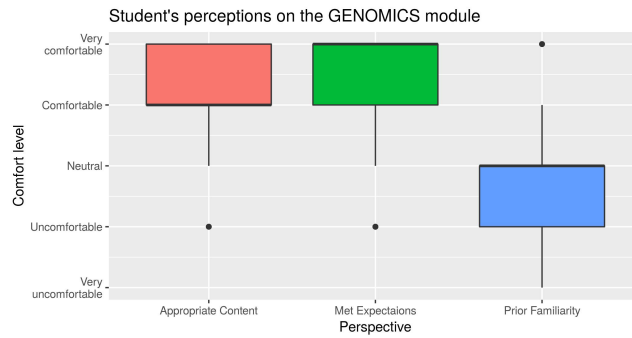

Figure SF10: IBT participants perceptions: Genomics module

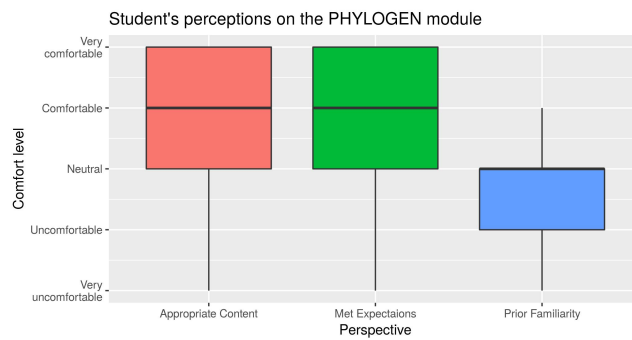

Figure SF11: IBT participants perceptions: phylogenetics module

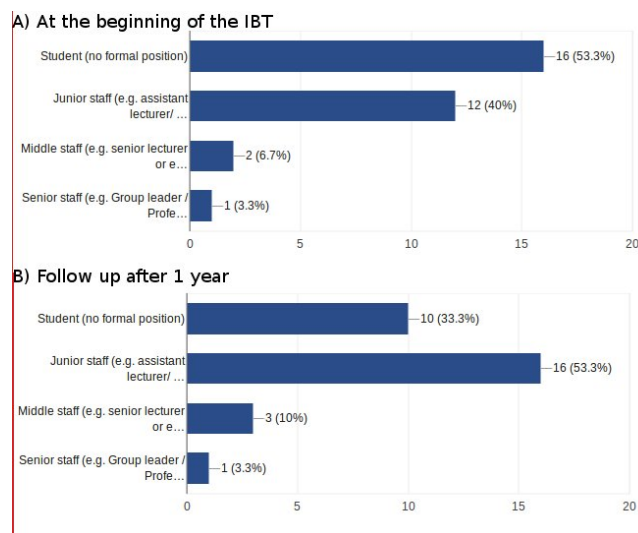

Figure SF12: Progress of a participants from the IBT 2017 iteration from their career status at the beginning of the course, and 1 year after that date.

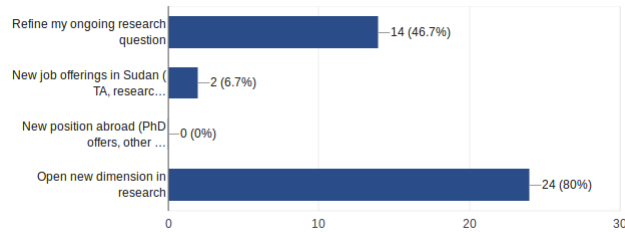

Figure SF13: Responses from the 30 participants from the 2017 IBT run collected 9 months upon the end of the course, asking about which ways the IBT helped them with their career.

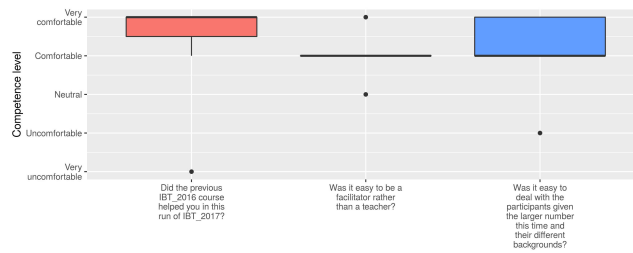

Figure SF14: TAs perspective: Evaluation of the teaching experience (n =7)

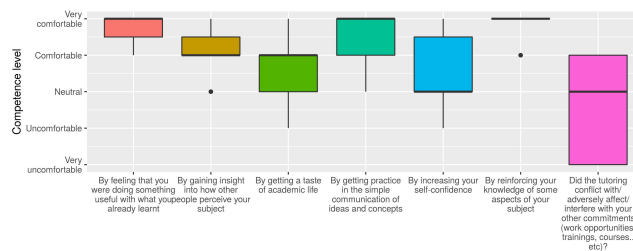

Figure SF15: TAs perspectives: Personal reflections (n=7)

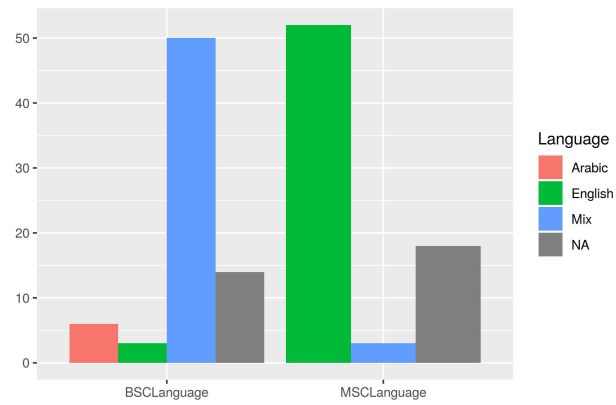

Figure SF16: Language of instruction of the IBT participants in their BSc and MSc education
